# Supplementary material for: Immunoglobulin domain interface exchange as a platform technology for the generation of Fc heterodimers and bispecific antibodies
Source: PubMed Central journal article supplement (PMC5465497; doi:10.1074/jbc.m117.782433), 2017-04-27
Supplement: 10.1074_M117.782433_jbc.M117.782433-1.pdf [file 10.1074_M117.782433_jbc.M117.782433-1.pdf]

## Supplemental Data for

### Immunoglobulin Domain Interface Exchange as a Platform Technology for the Generation of Fc Heterodimers and Bispecific Antibodies

Darko Skegro<sup>1,#</sup>, Cian Stutz<sup>1</sup>, Romain Ollier<sup>1</sup>, Emelie Svensson<sup>1</sup>, Paul Wassmann<sup>1,#</sup>, Florence Bourquin<sup>1,S</sup>, Thierry Monney<sup>1</sup>, Sunitha Gn<sup>2</sup>, and Stanislas Blein<sup>1\*</sup>

From the <sup>1</sup>Department of Antibody Engineering, Biologics Research, Glenmark Pharmaceuticals S.A., Chemin de la Combeta 5, 2300 La Chaux-de-Fonds, Switzerland; the <sup>2</sup>Department of Drug Metabolism and Pharmacokinetics, Glenmark Pharmaceuticals Limited, Glenmark Research Centre, Plot no.A-607, T.T.C. Industrial Area, MIDC, Mahape, Navi Mumbai-400 709, India.

\*To whom correspondence should be addressed: E-mail: [stanislas.blein@glenmarkpharma.com](mailto:stanislas.blein@glenmarkpharma.com), Tel: +41 32 729 35 50.

---

#### Supplemental method

*BEAT Fc preparation for DSC analysis*—To assess the intrinsic stability of the BEAT Fc, a BEAT Fc chain (B) with a C-terminal HA tag but without VL domain was co-expressed in HEK293-EBNA cells with a BEAT Fc chain (A) fused to a C-terminal poly-histidine tag. The resulting Fc heterodimer was purified using a two-step affinity purification strategy; in a first step, the filtered cell-culture supernatant was purified via anti-HA affinity chromatography (Roche Diagnostics AG, Rotkreuz, Switzerland), and eluted fractions were further purified in a second step by Ni<sup>2+</sup>-NTA chromatography (Qiagen GmbH, Hombrechtikon, Switzerland). Both chromatographic steps were run according to the resin manufacturer's protocol. The BEAT Fc material eluted from the final purification step was buffer exchanged into PBS before DSC analysis.

**FIGURE S1.** Amino acid sequences of parental and engineered CH3 and CH4 domains; previously described CH3 heterodimer sequences from the KiH and SEED technologies are included. Both the EU and IMGT numberings are shown for CH3 domains; for CH4 domains only the IMGT numbering is shown.

**FIGURE S2.** Schematic diagrams depicting the interfaces of BEAT min, IgM CH4, and BEAT CH4. The IMGT numbering is used. Charged residues are colored in red (negative) or blue (positive). Hydrophobic interactions are in grey lines, electrostatic interactions in dashed red lines. Grafted residue numbers are in yellow.

**FIGURE S3.** BEAT Fc. (A) BEAT Fc thermal unfolding by DSC. The single transition corresponds to the melting of the CH2 and engineered CH3 domains. (B) Solvent accessible surface area of the BEAT Fc highlighting TCR derived residues. TCR Ca derived residues are colored blue and TCR Cb derived residues are colored red.

**FIGURE S4.** Schematic diagrams depicting the interfaces of IgA CH3, IgD CH3, and SEED. The IMGT numbering is used. Charged residues are colored in red (negative) or blue (positive). Hydrophobic interactions are in grey lines, electrostatic interactions in dashed red lines. Grafted residue numbers are in yellow.

**FIGURE S5.** Impact of the W81T mutation in MI (CH3) AG/GA vs. SEED. (A) Fc-like proteins were purified by Protein A chromatography and monitored by SDS-PAGE. (B) Summary of heterodimer content.

**TABLE S1.** SPR binding affinities of BEAT 2/3 and variants thereof for human Fc receptors. Average KD values  $\pm$  SD based on three or more replicate measurements are shown. KD values are reported as follows: Fc $\gamma$ R1a = pM, Fc $\gamma$ R2a/Fc $\gamma$ R2b =  $\mu$ M; Fc $\gamma$ R3a/FcRn = nM. For each measurement, the Rmax and  $\chi^2$  values were used to evaluate the quality of the fit between the experimental data and the binding model; average Rmax and  $\chi^2$  values  $\pm$  SD based on three or more replicates for the same antibody-Fc receptor pair are shown; Rmax unit is RU and  $\chi^2$  unit is RU<sup>2</sup>. (a) BEAT 2/3 antibody used in cell assays and mouse xenograft studies. (b) BEAT 2/3 used in the rat pharmacokinetic study. The isotype of the different Ig constant domains within each BEAT Fc chain is indicated.

**TABLE S2.** Summary of the PK parameters in female Sprague-Dawley rats following iv bolus injection of the BEAT 2/3 antibody at 10 mg/kg. Abbreviations: AUC<sub>0-inf</sub> = area under the serum concentration-time curve from time zero to infinity; AUC<sub>0-last</sub> = area under the serum concentration-time curve from time zero to time point of last concentration measured; CL = clearance; C<sub>max</sub> = maximum serum concentration; IV = intravenous; PK = pharmacokinetic; SD = standard deviation; t<sub>1/2</sub> = elimination half-life; T<sub>max</sub> = time to reach maximum serum concentration following drug administration; Vz = apparent volume of distribution based on terminal phase; MRT<sub>inf</sub> = mean residence time extrapolated to infinity. (\*) median (min-max).

**TABLE S3.** SPR binding affinities of BEAT antibodies for EGFR, HER2, and HER3 extracellular domains. Average KD values  $\pm$  SD based on two or more replicate measurements are shown. KD values are reported in nM. For each measurement, the Rmax and  $\chi^2$  values were used to evaluate the quality of the fit between the experimental data and the binding model; average Rmax and  $\chi^2$  values  $\pm$  SD based on two or more replicates for the same antibody-antigen pair are shown; Rmax unit is RU and  $\chi^2$  unit is RU<sup>2</sup>. The isotype of the different Ig constant domains within each BEAT Fc chain is indicated. (n.a.) means non-applicable.

**TABLE S4.** Statistical analysis of Calu-3 xenograft studies. Method: one-way analysis of variance (ANOVA) followed by a Dunnett's post hoc test for multiple comparisons or Mann Whitney test for pairwise comparisons. P values of less than 0.05 were regarded as statistically significant. Asterisks denote statistically significant P values. (n.s.) means non-significant.

# FIGURE S1

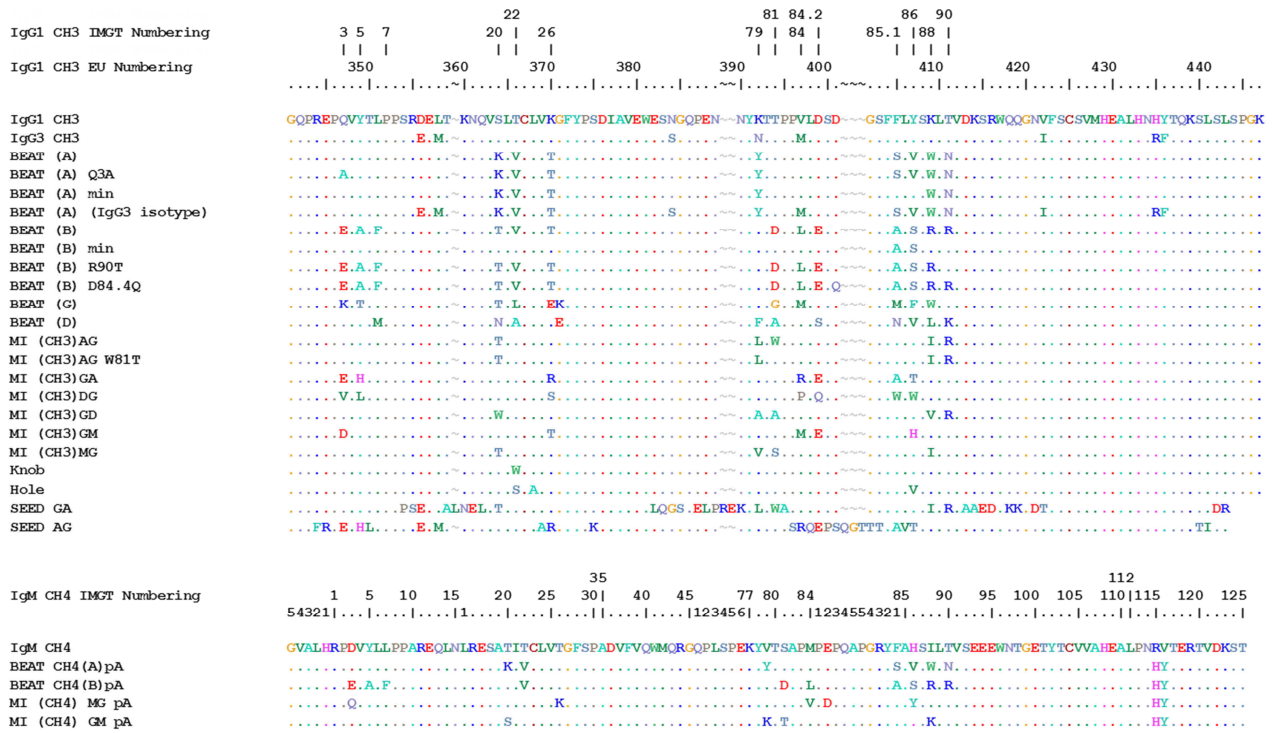

**FIGURE S2**

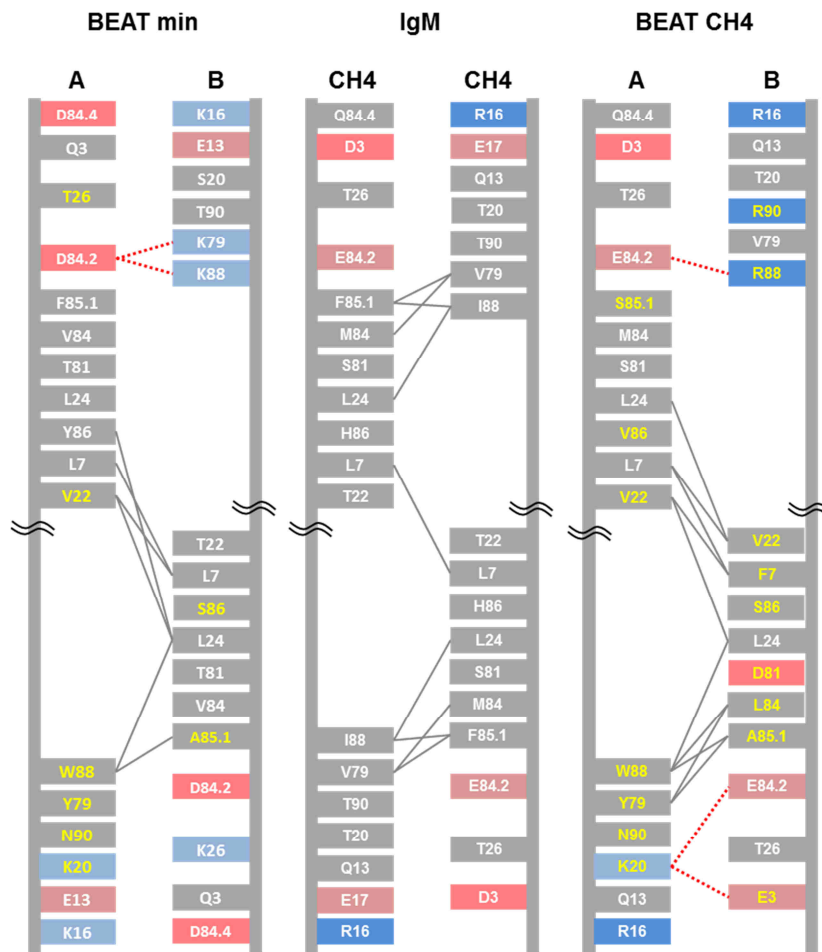

**FIGURE S3**

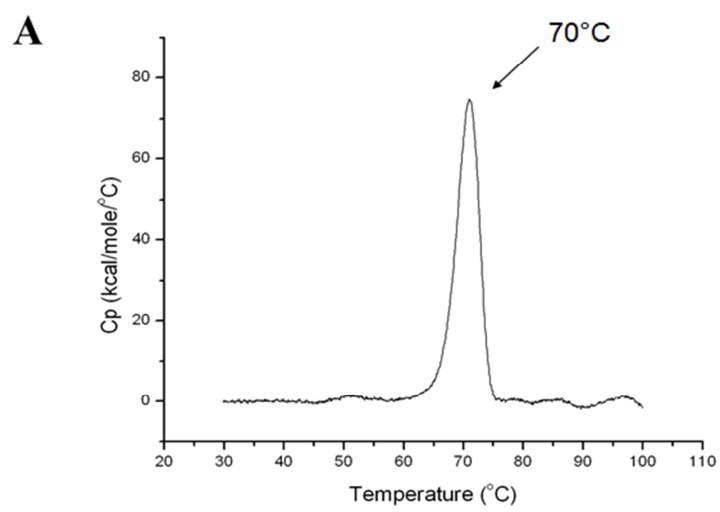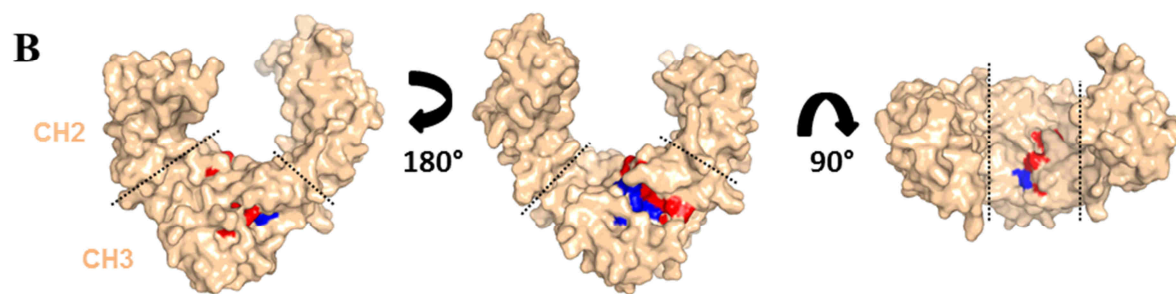

**FIGURE S4**

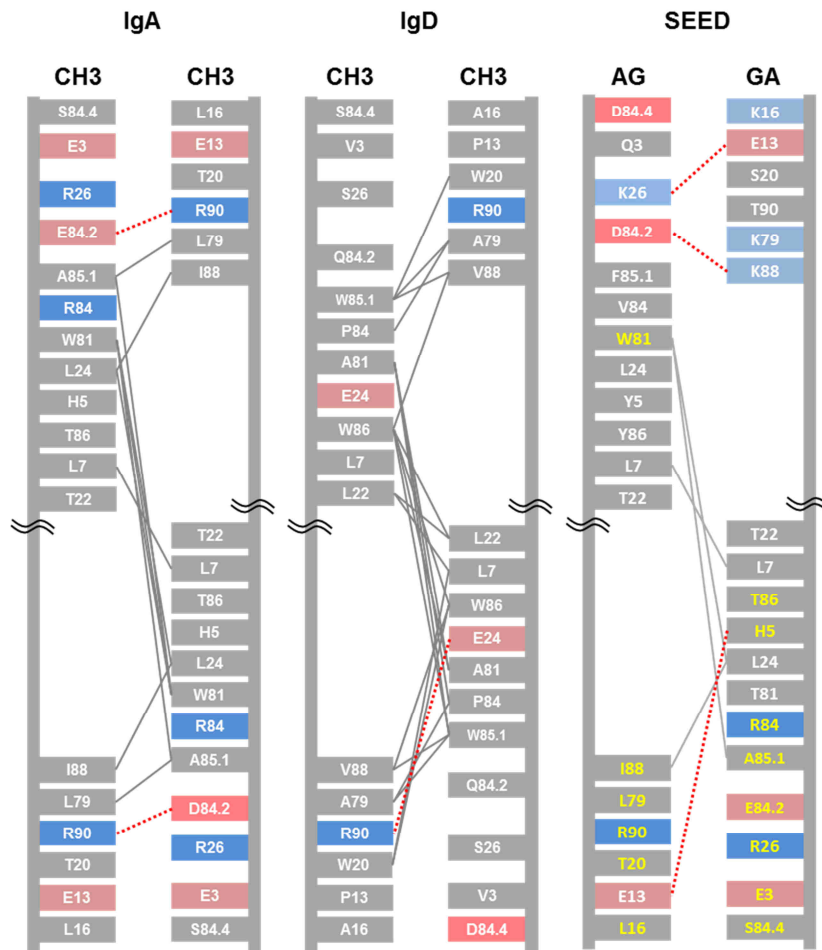

**FIGURE S5**

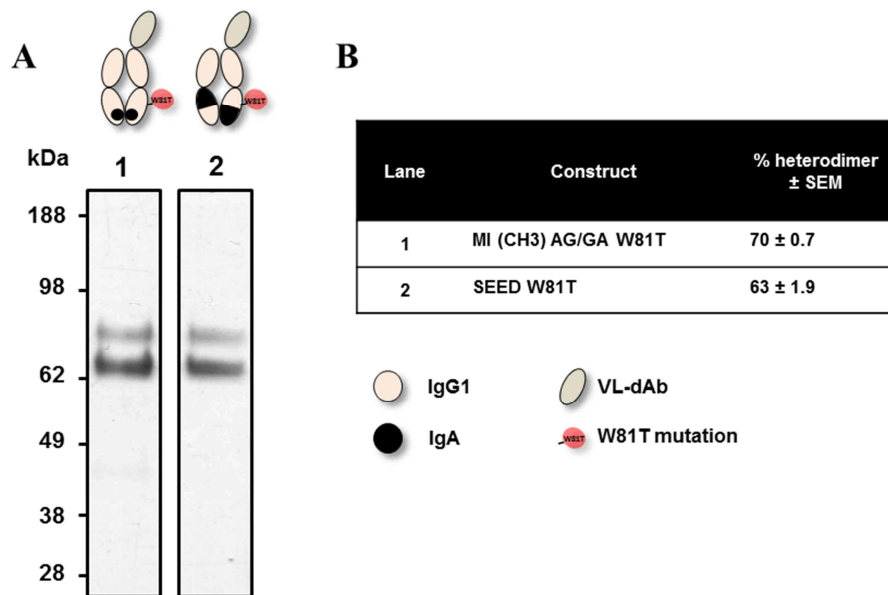

**TABLE S1**

| Antibody                                                                                |                | FcγR1a      | FcγR2a      | FcγR2b      | FcγR3a       | FcRn        |
|-----------------------------------------------------------------------------------------|----------------|-------------|-------------|-------------|--------------|-------------|
| BEAT 2/3 <sup>a</sup><br>(A): CH2 γ1 - BEAT CH3 (A) γ3<br>(B): CH2 γ1 - BEAT CH3 (B) γ1 | KD             | 135 ± 14    | 2.12 ± 0.01 | 3.64 ± 0.05 | 206 ± 0.5    | 708 ± 12.2  |
|                                                                                         | Rmax           | 116 ± 30    | 122 ± 1     | 117 ± 1     | 136 ± 1      | 506 ± 4     |
|                                                                                         | χ <sup>2</sup> | 0.4 ± 0.17  | 6.5 ± 0.61  | 3.57 ± 0.17 | 23.8 ± 0.15  | 10.7 ± 0.97 |
| BEAT 2/3 <sup>b</sup><br>A): CH2 γ3 - BEAT CH3 (A) γ3<br>(B): CH2 γ1 - BEAT CH3 (B) γ1  | KD             | 137 ± 12    | 1.49 ± 0.01 | 2.21 ± 0.01 | 105 ± 0.7    | 543 ± 10.5  |
|                                                                                         | Rmax           | 133 ± 55    | 120 ± 1     | 129 ± 1     | 161 ± 1      | 655 ± 19    |
|                                                                                         | χ <sup>2</sup> | 0.68 ± 0.47 | 8.75 ± 0.23 | 7.13 ± 0.28 | 22.33 ± 0.6  | 2.62 ± 0.98 |
| BEAT 2/3<br>(A): CH2 γ1 - BEAT CH3 (A) γ3<br>(B): CH2 γ1 - BEAT CH3 (B) γ1 D84.4Q       | KD             | 298 ± 13    | 3.91 ± 0.03 | 7.2 ± 0.11  | 347 ± 5.1    | 686 ± 17.4  |
|                                                                                         | Rmax           | 108 ± 1     | 107 ± 1     | 97 ± 1      | 116 ± 1      | 461 ± 5     |
|                                                                                         | χ <sup>2</sup> | 0.32 ± 0.08 | 3.41 ± 0.13 | 1.08 ± 0.09 | 14.47 ± 0.5  | 1.92 ± 0.91 |
| BEAT 2/3<br>(A): CH2 γ3 - BEAT CH3 (A) γ3<br>(B): CH2 γ1 - BEAT CH3 (B) γ1 D84.4Q       | KD             | 317 ± 11.5  | 2.36 ± 0.2  | 5.27 ± 0.5  | 238 ± 4.0    | 577 ± 13.1  |
|                                                                                         | Rmax           | 110 ± 1     | 110 ± 2     | 103 ± 2     | 124 ± 1      | 510 ± 6     |
|                                                                                         | χ <sup>2</sup> | 0.36 ± 0.01 | 4.02 ± 2.32 | 3.98 ± 2.22 | 14.17 ± 0.76 | 1.42 ± 1.43 |
| Herceptin IgG                                                                           | KD             | 138 ± 12    | 2 ± 0.2     | 4.27 ± 0.1  | 267 ± 3.9    | 622 ± 56.5  |
|                                                                                         | Rmax           | 92 ± 2      | 61 ± 6      | 61 ± 4      | 78 ± 11      | 389 ± 53    |
|                                                                                         | χ <sup>2</sup> | 0.31 ± 0.19 | 2.47 ± 1.55 | 1.07 ± 1.14 | 10.43 ± 5.61 | 8.45 ± 5.79 |



**TABLE S2**

| <b>Mean PK Parameters</b> | <b>Units</b>                      | <b>Mean (SD)</b>                                |
|---------------------------|-----------------------------------|-------------------------------------------------|
|                           |                                   | <b>Female Sprague Dawley Rat (10 mg/kg; IV)</b> |
| $C_{\max}$                | ( $\mu\text{g/ml}$ )              | 276 (29.72)                                     |
| $AUC_{0-\text{tlast}}$    | ( $\text{h}\cdot\mu\text{g/ml}$ ) | 12204 (4290.39)                                 |
| $AUC_{0-\text{inf}}$      | ( $\text{h}\cdot\mu\text{g/ml}$ ) | 12277 (4359.82)                                 |
| * $T_{\max}$              | (h)                               | 0.25 (0.25-0.25)                                |
| $t_{1/2}$                 | (h)                               | 164 (55.39)                                     |
| $V_z$                     | ( $\text{ml/kg}$ )                | 215 (121.14)                                    |
| CL                        | ( $\text{ml/min/kg}$ )            | 0.015 (0.006)                                   |
| $MRT_{\text{inf}}$        | (h)                               | 112 (30.37)                                     |

**TABLE S3**

| Antibody                                                                                                   |          | EGFR            | HER2            | HER3            |
|------------------------------------------------------------------------------------------------------------|----------|-----------------|-----------------|-----------------|
| BEAT 1/3<br>(A): CH2 $\gamma$ 1 - BEAT CH3 (A) $\gamma$ 3<br>(B): CH2 $\gamma$ 1 - BEAT CH3 (B) $\gamma$ 1 | KD       | $0.3 \pm 0.01$  | n.a.            | $2.5 \pm 0.1$   |
|                                                                                                            | Rmax     | $99 \pm 1$      | n.a.            | $124 \pm 7$     |
|                                                                                                            | $\chi^2$ | $0.84 \pm 0.23$ | n.a.            | $0.8 \pm 0.12$  |
| BEAT 2/3<br>(A): CH2 $\gamma$ 1 - BEAT CH3 (A) $\gamma$ 3<br>(B): CH2 $\gamma$ 1 - BEAT CH3 (B) $\gamma$ 1 | KD       | n.a.            | $2.9 \pm 0.9$   | $2 \pm 0.1$     |
|                                                                                                            | Rmax     | n.a.            | $128 \pm 3$     | $163 \pm 15$    |
|                                                                                                            | $\chi^2$ | n.a.            | $0.3 \pm 0.2$   | $1.6 \pm 0.7$   |
| Erbix (IgG1)                                                                                               | KD       | $0.83 \pm 0.01$ | n.a.            | n.a.            |
|                                                                                                            | Rmax     | $140 \pm 2$     | n.a.            | n.a.            |
|                                                                                                            | $\chi^2$ | $1.57 \pm 0.1$  | n.a.            | n.a.            |
| Herceptin (IgG1)                                                                                           | KD       | n.a.            | $4.7 \pm 0.4$   | n.a.            |
|                                                                                                            | Rmax     | n.a.            | $112 \pm 21$    | n.a.            |
|                                                                                                            | $\chi^2$ | n.a.            | $1.15 \pm 0.71$ | n.a.            |
| U1-59 (IgG1)                                                                                               | KD       | n.a.            | n.a.            | $1 \pm 0.05$    |
|                                                                                                            | Rmax     | n.a.            | n.a.            | $130 \pm 6$     |
|                                                                                                            | $\chi^2$ | n.a.            | n.a.            | $0.15 \pm 0.03$ |

**TABLE S4**

| <b>Dunnett's multiple comparison test</b> | <b>Adjusted P Value</b> | <b>Significant?</b> | <b>Summary</b> |
|-------------------------------------------|-------------------------|---------------------|----------------|
| Herceptin vs. Vehicle                     | 0.13                    | No                  | n.s.           |
| anti-HER3 vs. Vehicle                     | 0.93                    | No                  | n.s.           |
| Herceptin + anti-HER3 vs. Vehicle         | <0.001                  | Yes                 | ***            |
| Duligotuzumab vs. Vehicle                 | 0.004                   | Yes                 | **             |
| BEAT 2/3 vs. Vehicle                      | <0.001                  | Yes                 | ***            |
| <b>Mann Whitney test</b>                  |                         |                     |                |
| <b>Dunnett's multiple comparison test</b> | <b>Adjusted P Value</b> | <b>Significant?</b> | <b>Summary</b> |
| BEAT 2/3 vs. Herceptin                    | 0.0174                  | Yes                 | *              |
| BEAT 2/3 vs. anti-HER3                    | 0.0013                  | Yes                 | **             |
| BEAT 2/3 vs. Herceptin + anti-HER3        | 0.0181                  | Yes                 | *              |
